# Supplementary material for: Drug-Loaded, Polyurethane Coated Nitinol Stents for the Controlled Release of Docetaxel for the Treatment of Oesophageal Cancer
Source: Pharmaceuticals (Basel). 2021 Apr 1;14(4):311. doi: 10.3390/ph14040311 (PMC8067330; doi:10.3390/ph14040311)
Supplement: Supplementary file 1 [file pharmaceuticals-14-00311-s001.pdf]

## Supplementary information

# Drug-loaded, polyurethane coated nitinol stents for the controlled release of docetaxel for the treatment of oesophageal cancer

Paris Fouladian <sup>1</sup>, Qiuyang Jin <sup>2</sup>, Mohammad Arafat <sup>1</sup>, Yunmei Song <sup>1</sup>, Xiuli Guo <sup>2,\*</sup>, Anton Blencowe <sup>3,\*</sup>  
and Sanjay Garg <sup>1,\*</sup>

<sup>1</sup> Pharmaceutical Innovation and Development (PIDG) Group, Clinical and Health Sciences, University of South Australia, Adelaide, SA 5000, Australia; paris.fouladian@mymail.unisa.edu.au (P.F.); mohammad.arafat@mymail.unisa.edu.au (M.A.); May.Song@unisa.edu.au (Y.S.)

<sup>2</sup> Key Laboratory of Chemical Biology (Ministry of Education), Department of Pharmacology, School of Pharmaceutical Sciences, Shandong University, Jinan 250012, China; jcas09@163.com

<sup>3</sup> Applied Chemistry and Translational Biomaterials (ACTB) Group, Clinical and Health Sciences, University of South Australia, Adelaide, SA 5000, Australia

\* Correspondence: guoxl@sdu.edu.cn (X.G.); anton.blencowe@unisa.edu.au (A.B.); sanjay.garg@unisa.edu.au (S.G.)

**Table S1.** Stents diameters, before and after the coating.

| Stent                                     | Before coating (mm) | After coating (mm) |
|-------------------------------------------|---------------------|--------------------|
| Flange length                             | 10.01 ± 0.03        | 10.07 ± 0.11       |
| Flange outer diameter                     | 30.35 ± 0.58        | 31.12 ± 0.12       |
| Cylinder (central area) length            | 40.04 ± 0.04        | 40.23 ± 0.06       |
| Cylinder (central area) outer diameter    | 28.03 ± 0.05        | 28.63 ± 0.52       |
| Wall thickness (including the metal mesh) | 0.41 ± 0.03         | 0.46 ± 0.01        |

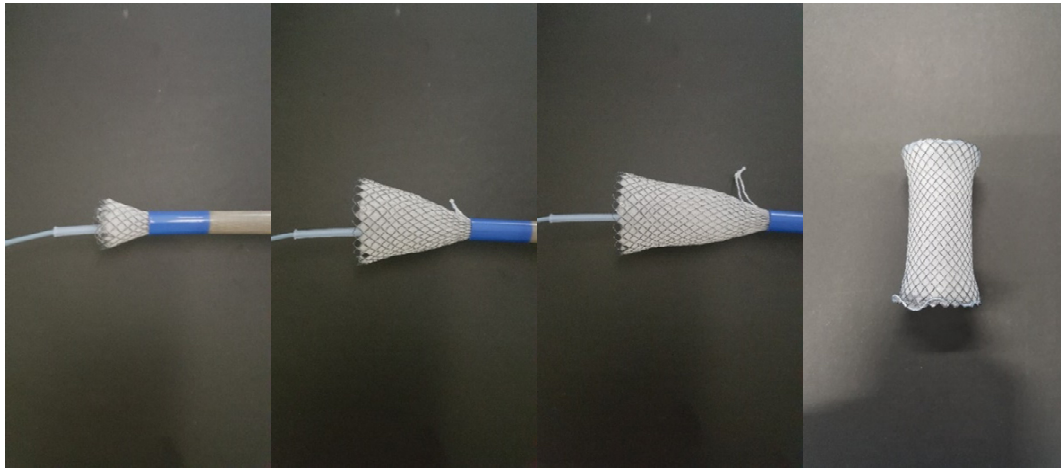

**Figure S1.** The series of images from left to right show the deployment of the dip-coated stent using a stent introducer and the intact stent after deployment.

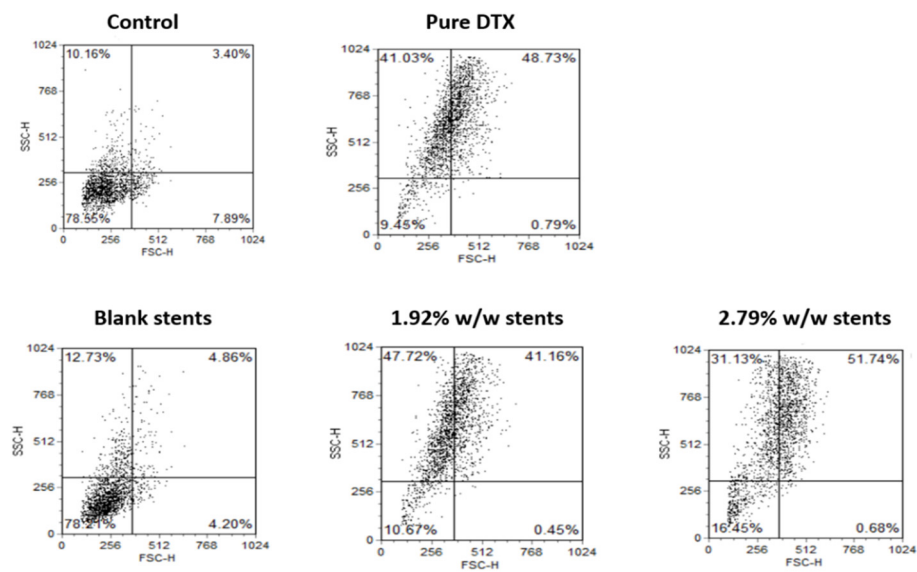

**Figure S2.** DESs and pure DTX induced cell apoptosis in KYSE30 cells *via* Annexin V-FITC/PI double staining. Apoptosis rate of KYSE30 cells after treatment with pure DTX (1 g/ml) or DESs solution for 48 h were detected by flow cytometric analysis after Annexin V-FITC/PI double staining.

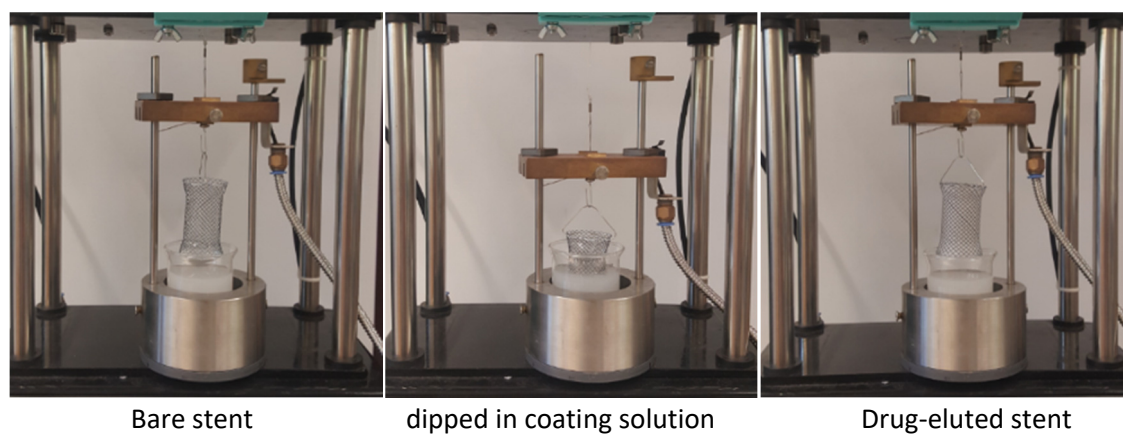

**Figure S3.** Process of dip coating of metal nitinol oesophageal stent into the DTX-Chronosil solution.

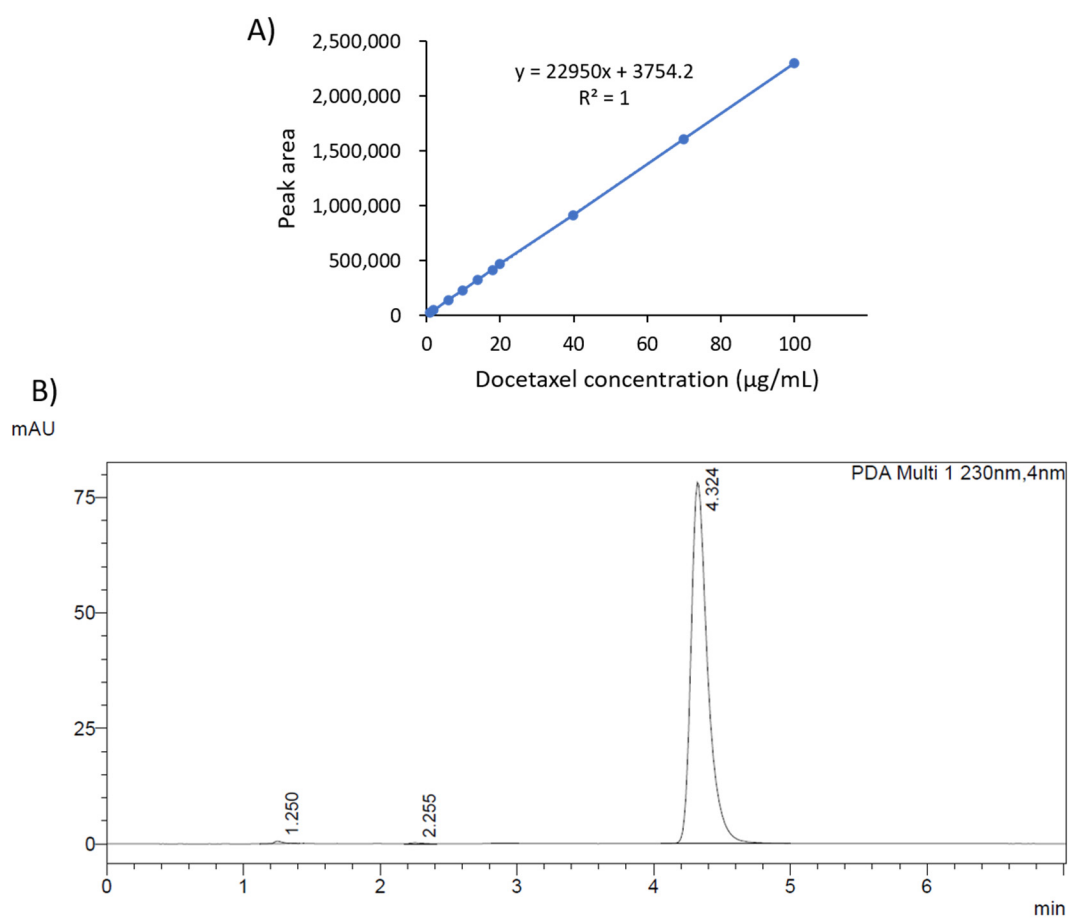

**Figure S4.** A) Standard calibration curve of docetaxel (in mobile phase medium (mixture of ammonium acetate buffer (0.02 M, pH 5) and acetonitrile (43:57% v/v)) by HPLC. B) HPLC chromatogram of docetaxel in mobile phase medium. DTX retention time: 4.324 min
